# Supplementary material
Source: publisher figshare collection journal article supplement (https://gsapubs.figshare.com/ndownloader/files/22411098)
Supplement: Supplementary file 1 [file 22411098]

## Sheet: Feuil1
Unit	Outcrop	Sample	Longitude	Latitude
Foliated Morotsuka		HN 44	131.378	32.5145
		HN52-bis	131.243	32.4161
		HN 61	131.856	32.7202
		HN 63	131.478	32.6029
		HN145	131.558	32.6137
		HN196	131.31	32.4334
		HN285	131.239	32.4201
	203C		131.105	32.4247
Hyuga Tectonic mélange		HN 51	131.243	32.4161
		HN 54	131.731	32.5913
		HN 64	131.463	32.5944
		HN 65	131.404	32.5452
		HN 68	131.399	32.5494
		HN 75	131.245	32.4162
		HN 77	131.245	32.4162
		HN 85	131.315	32.4287
		HN 91	131.243	32.4161
		HN 93	131.582	32.6044
		HN 94	131.576	32.6084
		HN200	131.314	32.4288
		HN299	131.279	32.4033
	202M		131.278	32.4151
Schistes Lustrés		2B	6.86482	44.9752
		10B	Haute vallée de l'Ubaye
			(6,89062)	(44,60916)
	Figure 3D		6.96795	44.6049
Flysch à Helminthoïdes		FH2	6.72594	44.5263
		F6H2	6.72594	44.5263
		FH4	6.76392	44.5224
		FH7-2	6.82747	44.3359
		FH12	6.74108	44.5011
		FH21b	6.74458	44.5153
		FH22	6.70521	44.5358
		FH103B	6.81894	44.3321
		FH114	6.65147	44.5584
	Figure 3B		6.72594	44.5263
